# Supplementary material
Source: publisher figshare collection journal article supplement (https://frontiersin.figshare.com/ndownloader/files/17503337)
Supplement: Supplementary file [file 17503337]

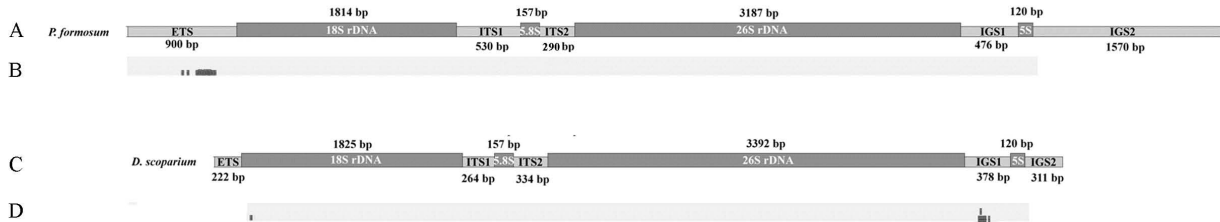

Figure S2 Diagrams of assembled *P. formosum* (A) and *D. scoparium* (C) rDNA units. Positions of polymorphic sites are shown in (B, D). There were 40 and 19 single nucleotide variants (SNV) in the rDNA units in *P. formosum* and *D. scoparium*, respectively.
